# Supplementary material for: Substrate Binding Switches the Conformation at the Lynchpin Site in the Substrate-Binding Domain of Human Hsp70 to Enable Allosteric Interdomain Communication
Source: Molecules. 2018 Feb 27;23(3):528. doi: 10.3390/molecules23030528 (PMC6017645; doi:10.3390/molecules23030528)
Supplement: Supplementary file 1 [file molecules-23-00528-s001.pdf]

## Supplementary Materials

### Substrate Binding Switches the Conformation at the Lynchpin Site in the Substrate-Binding Domain of Human Hsp70 to Enable Allosteric Interdomain Communication

Kohei Umehara <sup>1,†</sup>, Miho Hoshikawa <sup>1,†</sup>, Naoya Tochio <sup>2,‡</sup>, and Shin-ichi Tate <sup>1,2,\*</sup>

<sup>1</sup> Department of Mathematical and Life Sciences, School of Science, Hiroshima University, 1-3-1 Kagamiyama, Higashi-Hiroshima 739-8526, Japan; m161409@hiroshima-u.ac.jp (K.U.); miho.hoshikawa.0925@gmail.com (M.H.)

<sup>2</sup> Research Center for the Mathematics on Chromatin Live Dynamics (RcMcD), Hiroshima University, 1-3-1 Kagamiyama, Higashi-Hiroshima 739-8526, Japan; naoya-tochio@hiroshima-u.ac.jp (N.T.)

<sup>‡</sup> Present address: Faculty of Pharma-Sciences, Teikyo University, 2-11-1, Kaga, Itabashi-ku, Tokyo 173-8605, Japan; tochio@pharm.teikyo-u.ac.jp (N.T.)

<sup>†</sup> These authors equally contributed to this work

<sup>\*</sup> Correspondence: tate@hiroshima-u.ac.jp; Tel.: +81-82-424-7387

Supplementary Figures: Figure S1 – S12

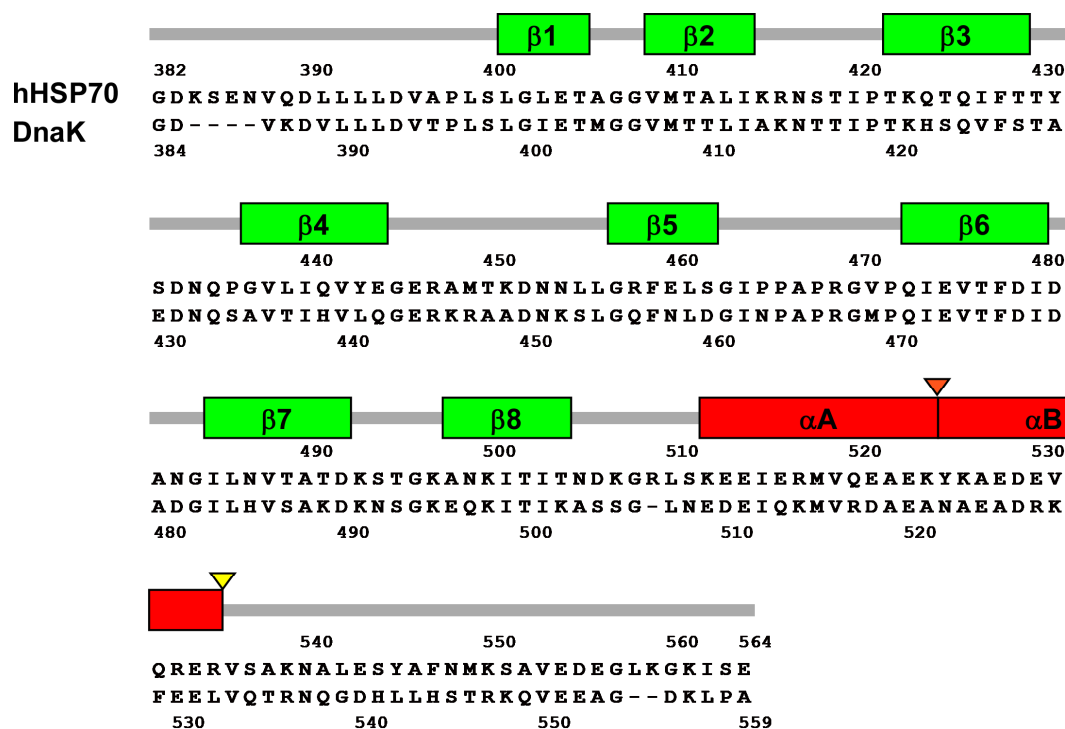

**Figure S1.** Sequence alignment of human Hsp70 (HSPA1A) and bacterial (*E. coli*) DnaK protein sequences. Secondary structure elements determined for SBD( $\Delta$ CDE) by NMR are shown with boxes in green ( $\beta$ -strand) and red ( $\alpha$ -helix). The construct for SBD( $\Delta$ CDE) contains the sequence (residues 382–564) shown for hHsp70. The red triangle is the hinge position between  $\alpha$ A and  $\alpha$ B in the  $\alpha$ Lid. The junction position at which the  $\alpha$ -helical stability changes in  $\alpha$ B of the  $\alpha$ Lid is indicated by the yellow triangle.

**a**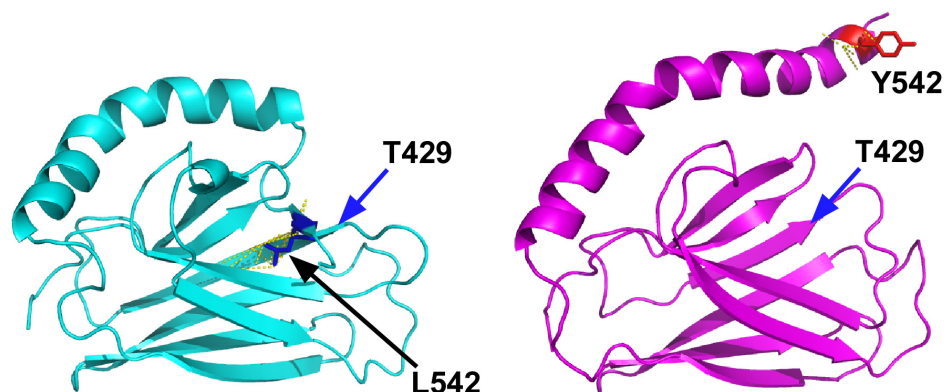**b**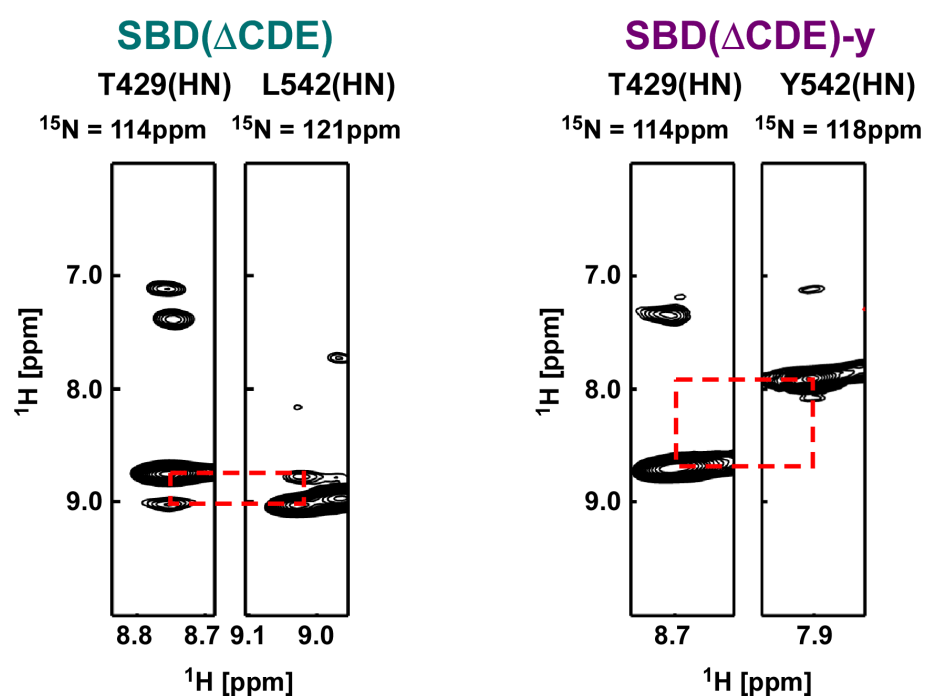

**C**

**SBD( $\Delta$ CDE)**

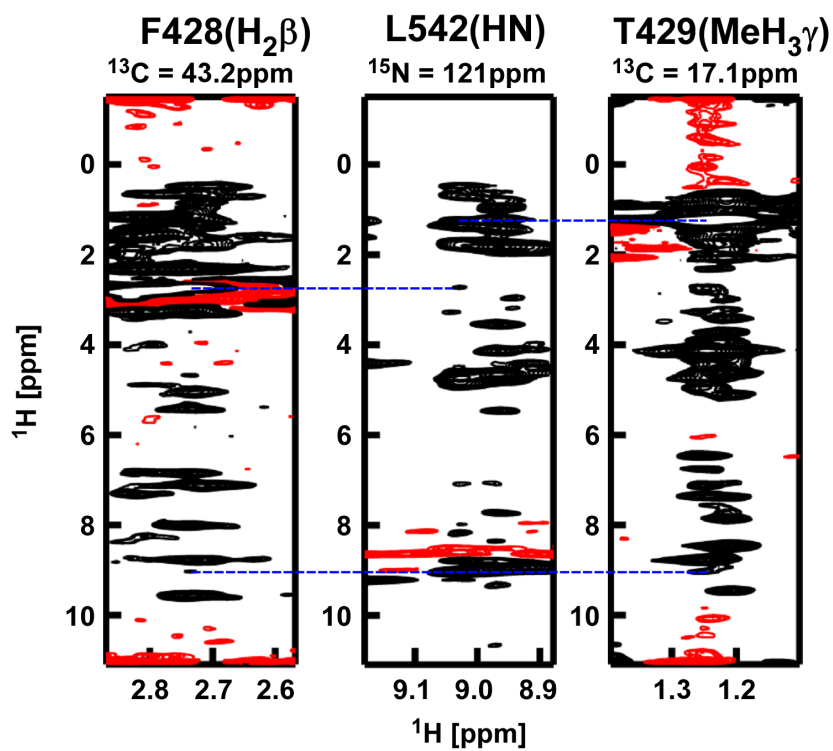

**SBD( $\Delta$ CDE)-y**

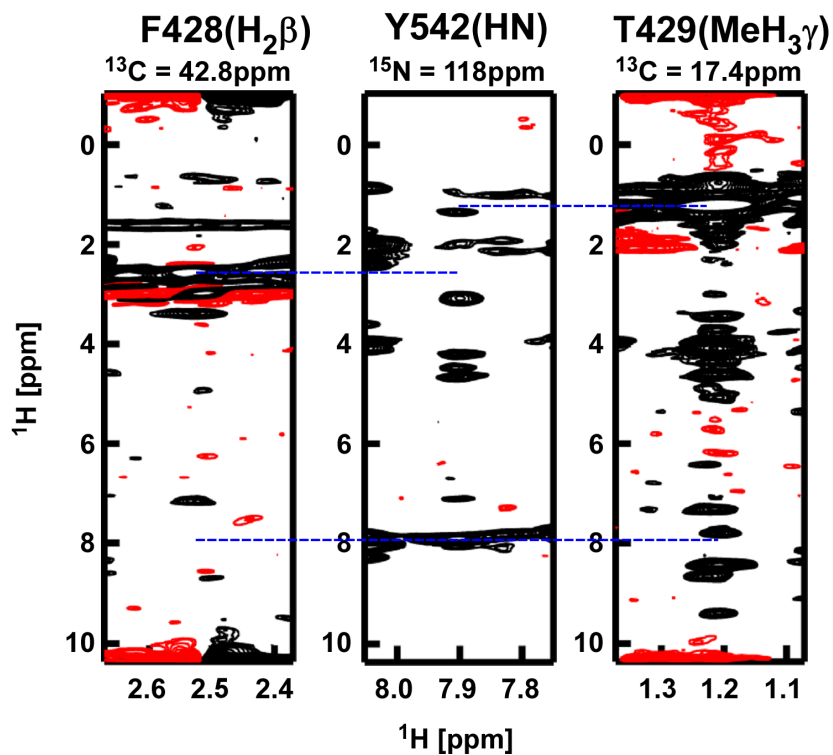

**Figure S2.** Structural changes caused by elimination of the intramolecular interaction between  $\alpha$ B in  $\alpha$ Lid and  $\beta$ SBD. (a) Structures of SBD( $\Delta$ CDE) and SBD( $\Delta$ CDE)-y showing the observed NOEs (yellow dashed lines) for T429/L542 and T429/Y542, respectively. (b) Changes in the NOE pattern between the amide protons of the residues T429 and L(Y)542 because of the L542Y mutation. (c) The additional NOEs to connect L542 to F428 and T429 are lost in the L542Y mutant: H<sub>2</sub> $\beta$  and MeH<sub>3</sub> $\gamma$  denote unresolved  $\beta$  methylene protons and  $\gamma$  methyl protons for F428 and T429, respectively. The mutation removes the intramolecular interaction between  $\alpha$ B and the substrate binding cleft in  $\beta$ SBD. The signals in red represent the negative intensities due to the spectral folding over in <sup>13</sup>C dimension.

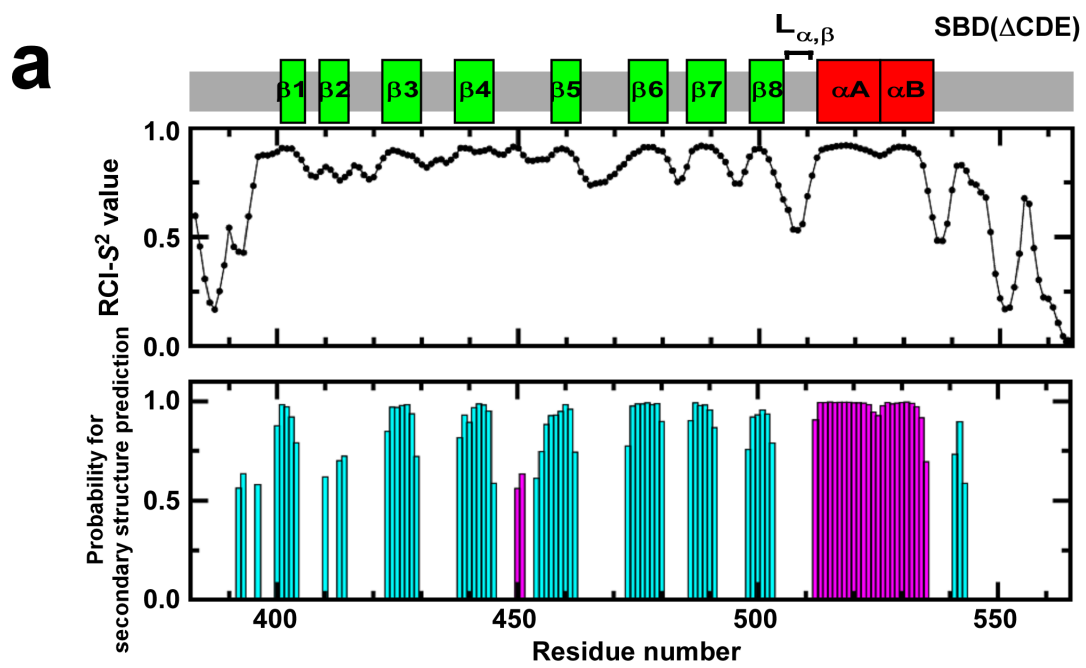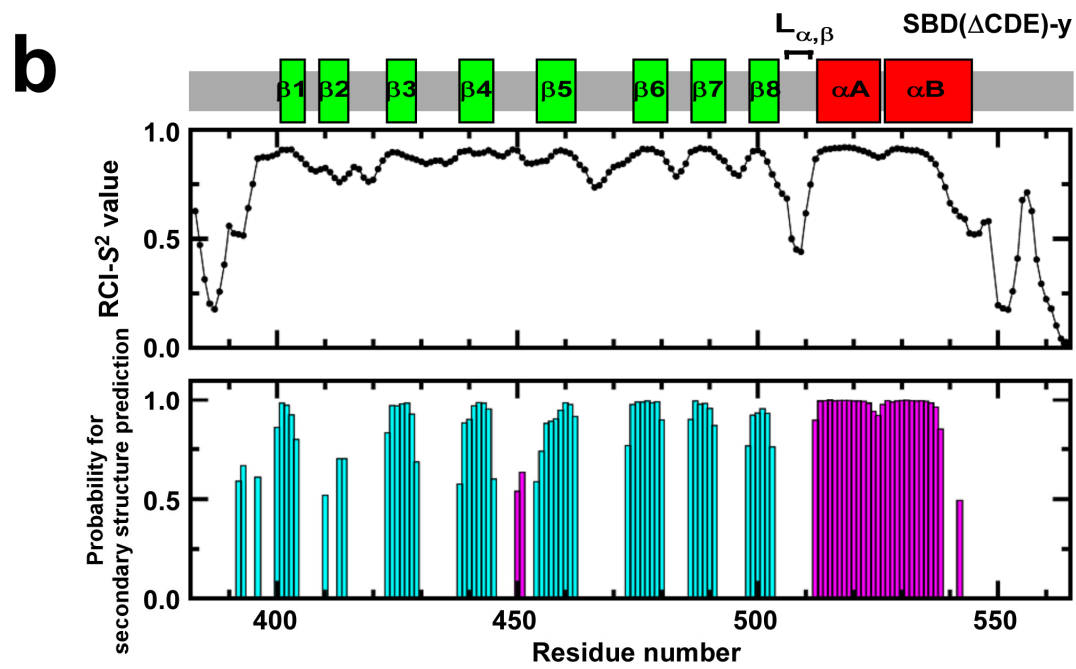

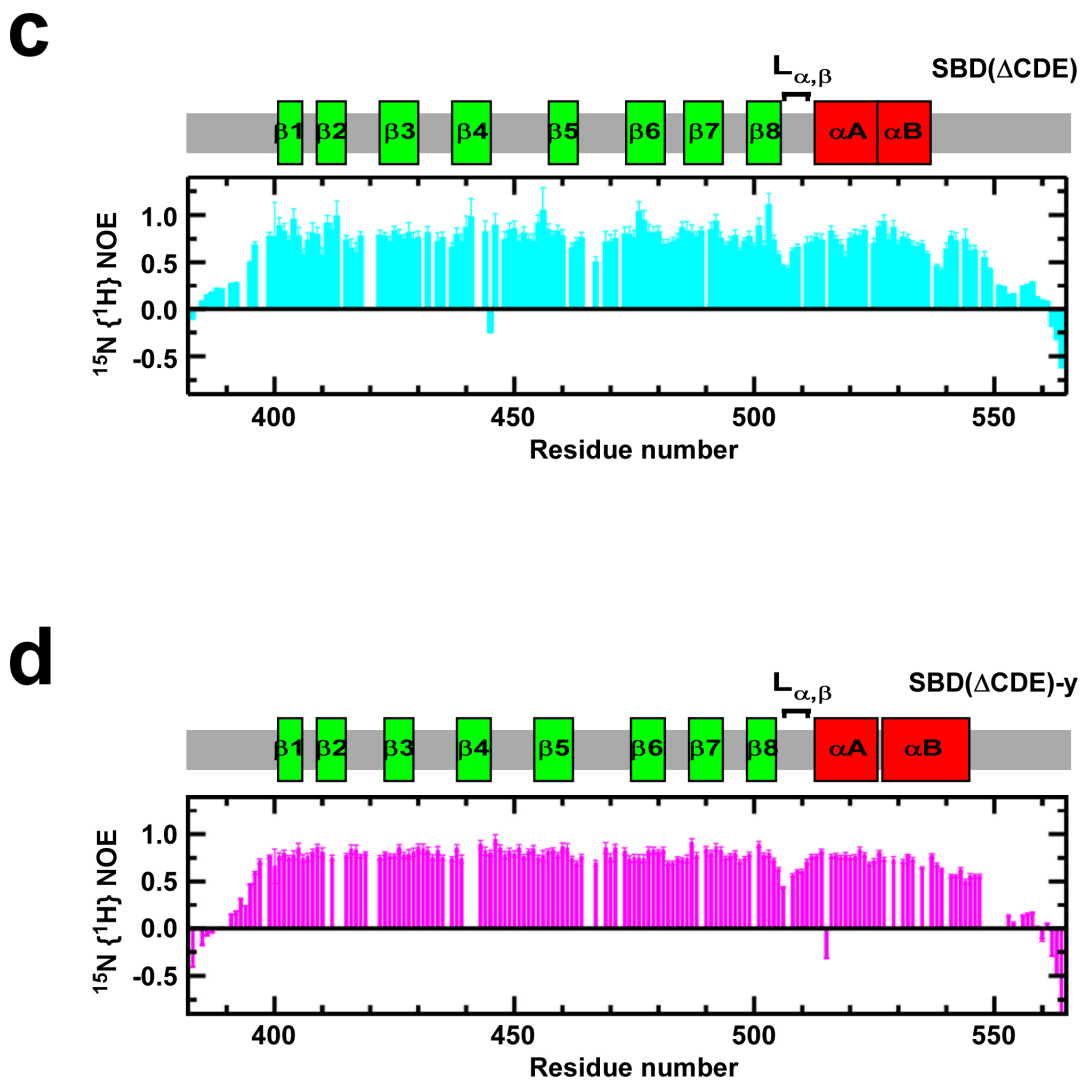

**Figure S3.** Structural flexibility in SBD( $\Delta$ CDE) and SBD( $\Delta$ CDE)-y. Predicted secondary structures from the backbone chemical shifts using the programs RCI (top) [1] and TALOS+ (bottom) [2] for (a) SBD( $\Delta$ CDE) and (b) SBD( $\Delta$ CDE)-y. (c) the hNOE values for SBD( $\Delta$ CDE) (cyan) and (d) SBD( $\Delta$ CDE)-y (magenta)

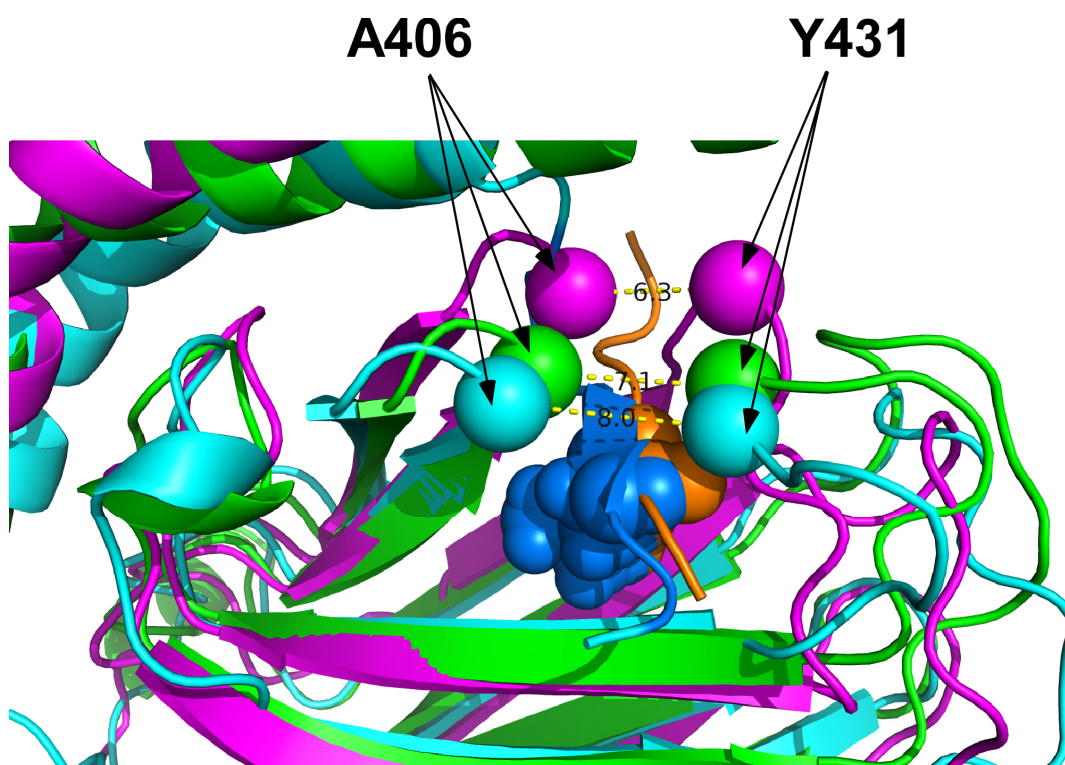

**Figure S4.** Structural comparison of the substrate binding loops, L<sub>1,2</sub> and L<sub>3,4</sub>. Superpositioned structures of SBD(ΔCDE)-y (magenta), SBD(ΔCDE) (cyan) and the crystal structure of the NR-peptide bound SBD of human Hsp70 (green) (PDB ID: 4PO2) [3]. The C $\alpha$  positions of A406 (L<sub>1,2</sub>) and Y431 (L<sub>3,4</sub>) are drawn as spheres. The distances between the C $\alpha$  atoms of A406 and Y431 for the three structures are presented in yellow.

**a**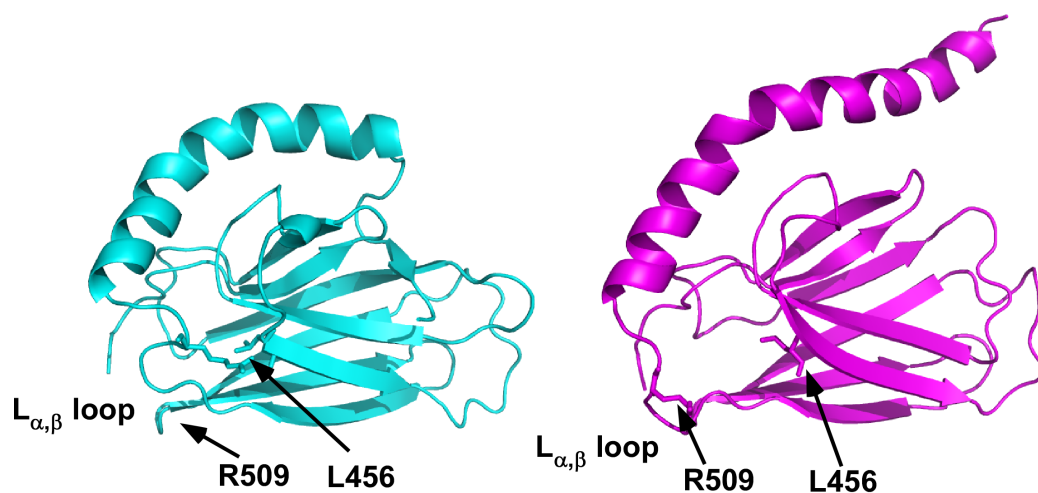**b**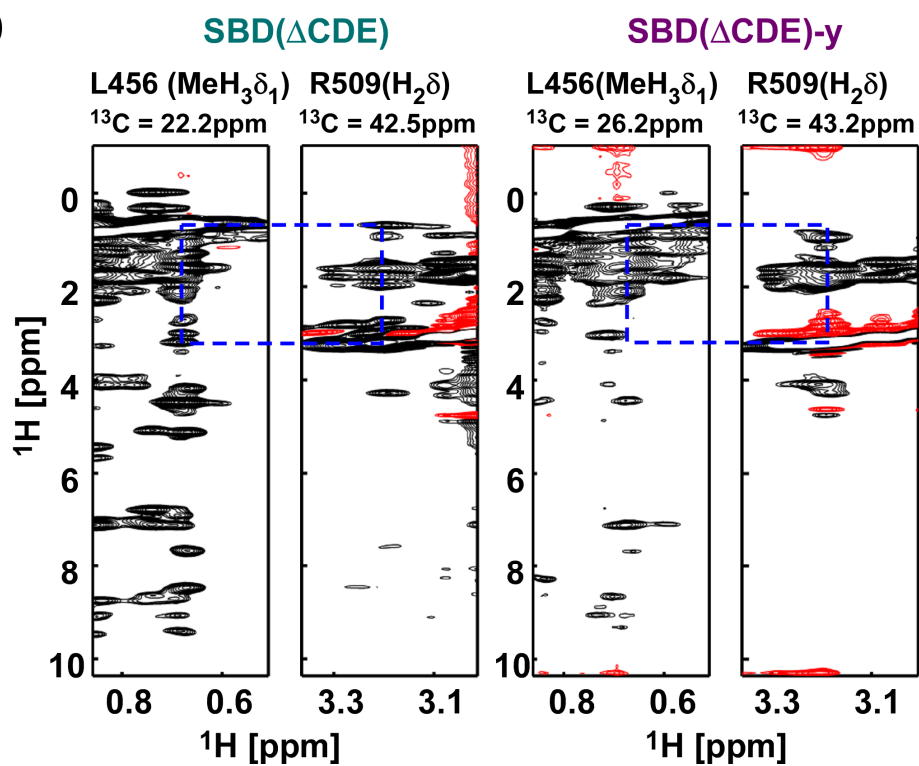

**Figure S5.** Difference in the conformation of the  $L_{\alpha,\beta}$  loop between SBD( $\Delta$ CDE) and SBD( $\Delta$ CDE)-y. (a) Structures of SBD( $\Delta$ CDE) and SBD( $\Delta$ CDE)-y with the side chains of residues L456 and R509 shown as stick models. (b) The NOEs observed for residues L456 and R509 in SBD( $\Delta$ CDE) are absent in the corresponding spectrum for SBD( $\Delta$ CDE)-y.

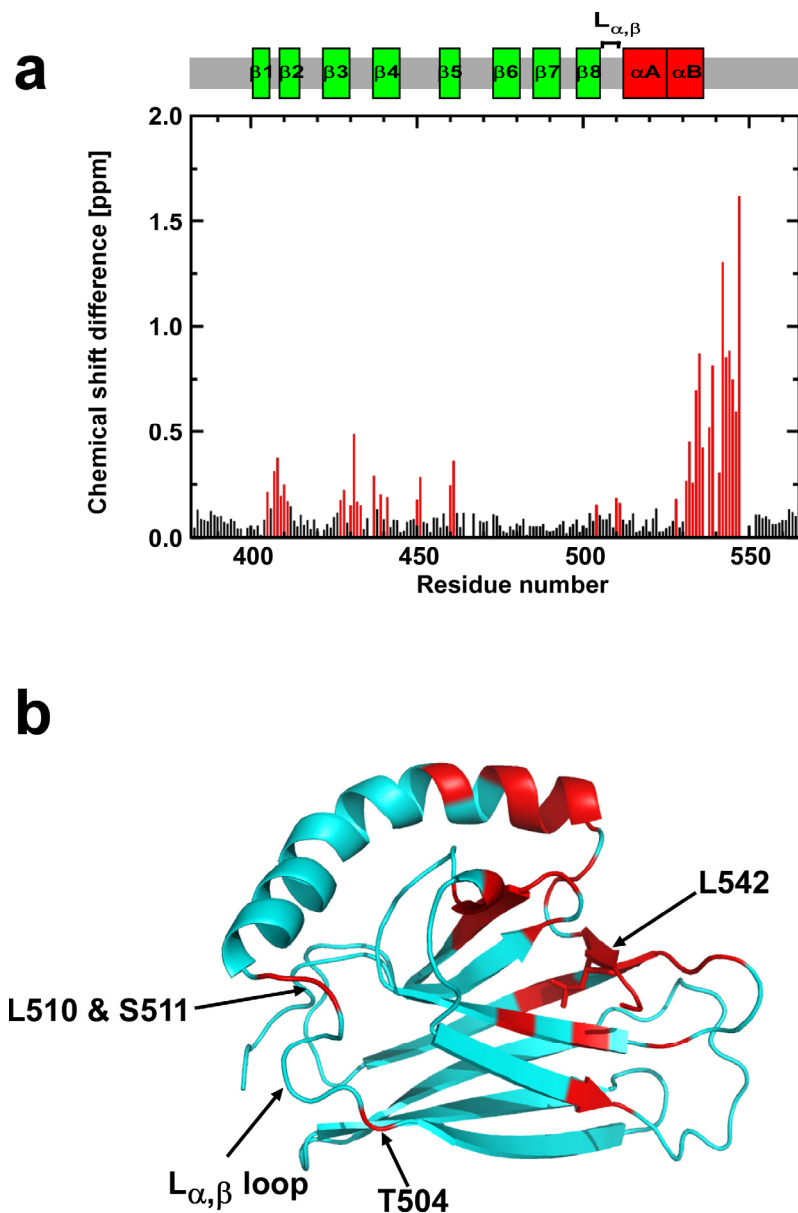

**Figure S6.** Normalized weighted average  $^1\text{H}$  and  $^{15}\text{N}$  chemical shift differences between SBD( $\Delta\text{CDE}$ ) and SBD( $\Delta\text{CDE}$ )-y. (a) Per residue weighted chemical shift differences,  $\Delta\delta = \sqrt{\Delta\delta(^1\text{H})^2 + (\Delta\delta(^{15}\text{N}) / 5)^2}$ , are plotted. The  $\Delta\delta$  values that are above the average value (0.147ppm) are shown in red and (b) have been mapped onto the SBD( $\Delta\text{CDE}$ ) structure (red).

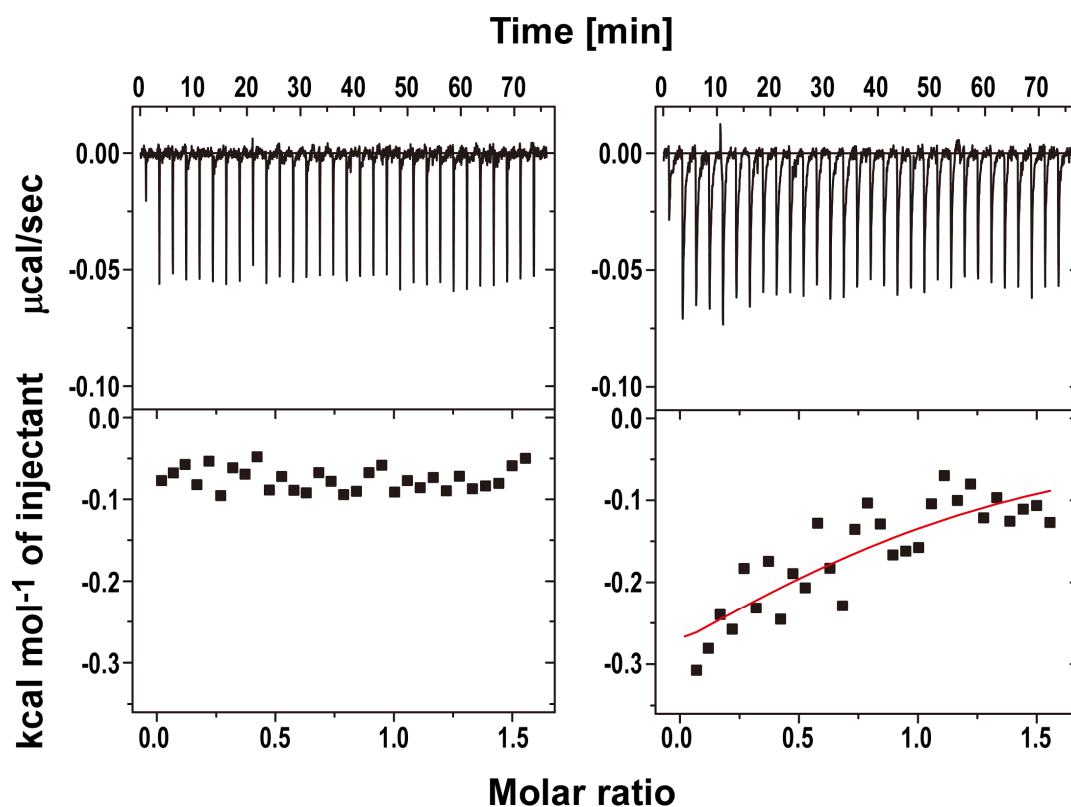

**Figure S7.** Isothermal titration calorimetry data for the NR-peptide titration with SBD( $\Delta$ CDE)-y. Each thermal response comes from 1.5  $\mu$ L injections of the peptide containing solution to the buffer solution (left) or to the SBD( $\Delta$ CDE)-y solution (right). The thermogram coupled with the peptide binding (right) is significantly greater in magnitude than that observed in dilution (left). The solid red line in the  $\Delta H$  plot is the best-fit model function assuming a 1:1 stoichiometry between the peptide and SBD( $\Delta$ CDE)-y. Triplicated ITC data were subjected to the fitting with the model function to give a  $K_D = 1.5 \pm 0.3$  mM, as an average and standard deviation of the three  $K_D$  values determined in each experiment.

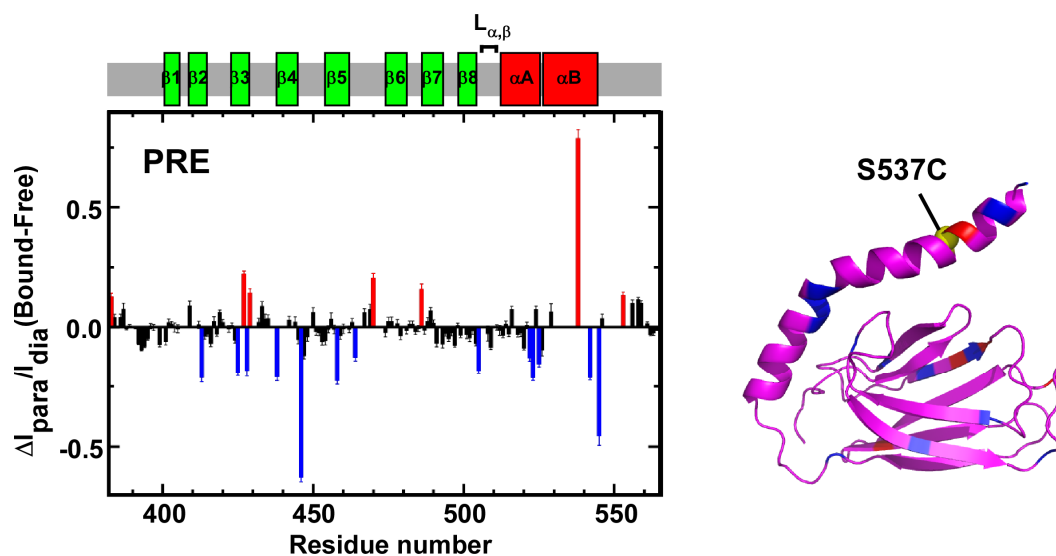

**Figure S8.** Change in the PRE effects caused by NR-peptide binding to SBD( $\Delta$ CDE)-y. The PRE effect was evaluated as the NMR intensity ratio  $I_{para}/I_{dia}$ , where  $I_{para}$  and  $I_{dia}$  denote the NMR signal intensities collected for the protein labeled with the paramagnetic spin label and the diamagnetic label, respectively. The graph shows the per residue difference in the PRE effect ( $\Delta I_{para}/I_{dia}$ ) between the presence and absence of the NR-peptide, where  $\Delta I_{para}/I_{dia} = I_{para}/I_{dia}$  (peptide-bound) –  $I_{para}/I_{dia}$  (free). Red and blue bars represent  $\Delta I_{para}/I_{dia}$  values for residues that are greater than one standard deviation (0.107 as an absolute value) above the average  $\Delta I_{para}/I_{dia}$  value (0.072 as an absolute value). Positive  $\Delta I_{para}/I_{dia}$  values (red) indicate that residues have moved away from the spin label at residue 537 upon SBD( $\Delta$ CDE)-y binding the peptide, whereas negative  $\Delta I_{para}/I_{dia}$  values (blue) indicate that residues have moved closer to the spin label in the peptide-bound state.

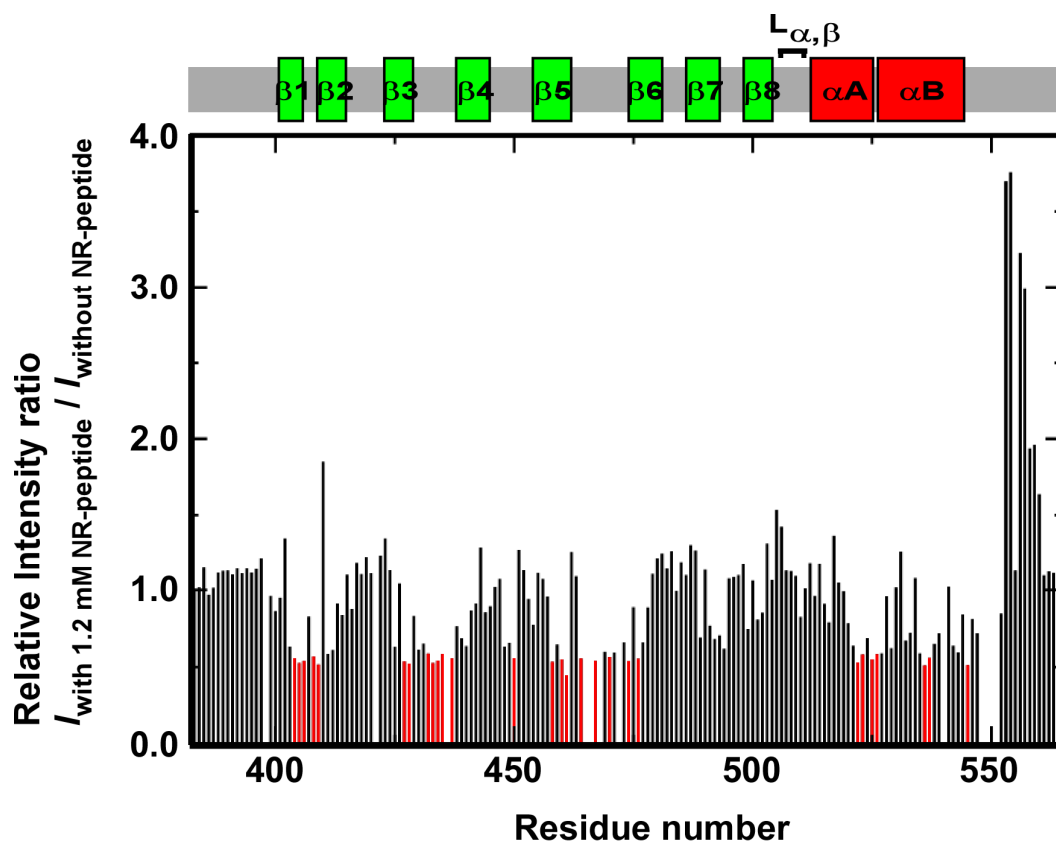

**Figure S9.** Changes in signal intensities caused by the NR-peptide binding to SBD( $\Delta$ CDE)-y. Binding of the NR-peptide to SBD( $\Delta$ CDE)-y caused NMR spectral changes in the slow exchange time regime on the chemical shift time scale. Peptide-binding to SBD( $\Delta$ CDE)-y was, therefore, monitored by the reduction in the intensities of the resonances for the free protein state. The relative NMR signal intensities collected for the protein in the presence of the NR-peptide at 1.2 mM concentration against the corresponding signals for the free-state protein (0.3 mM) are plotted. Values less than 0.8 times the standard deviation (0.386) from the average value (0.970) are marked in red, showing that the corresponding residues are engaged in peptide binding when compared with that of the other residues in the protein.

**a**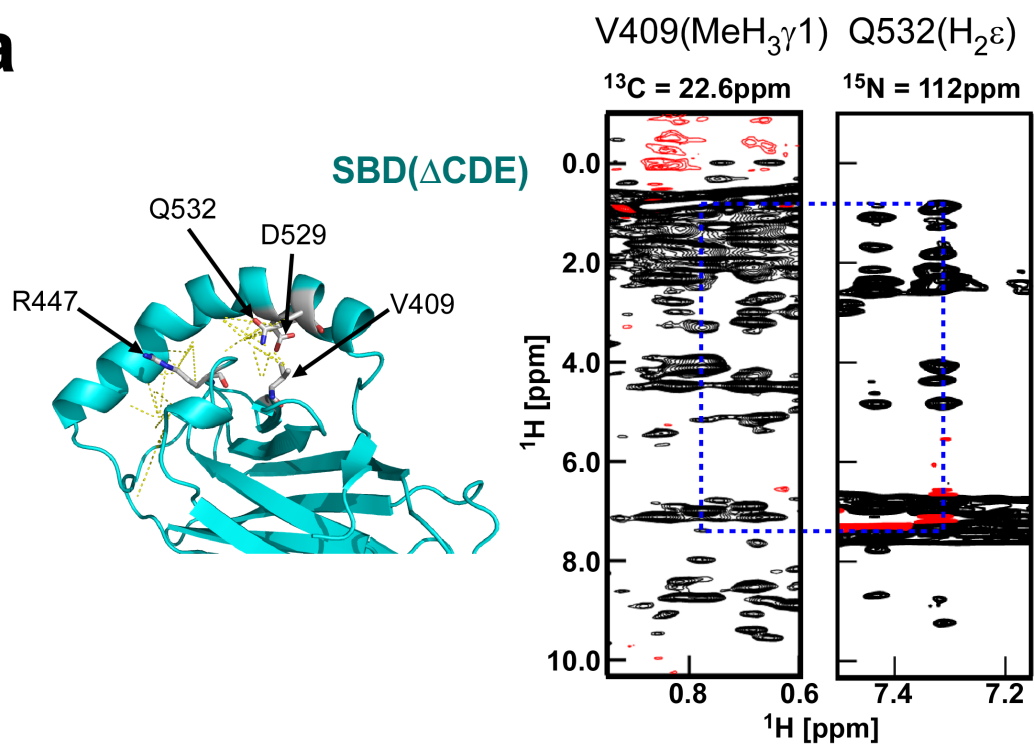**b**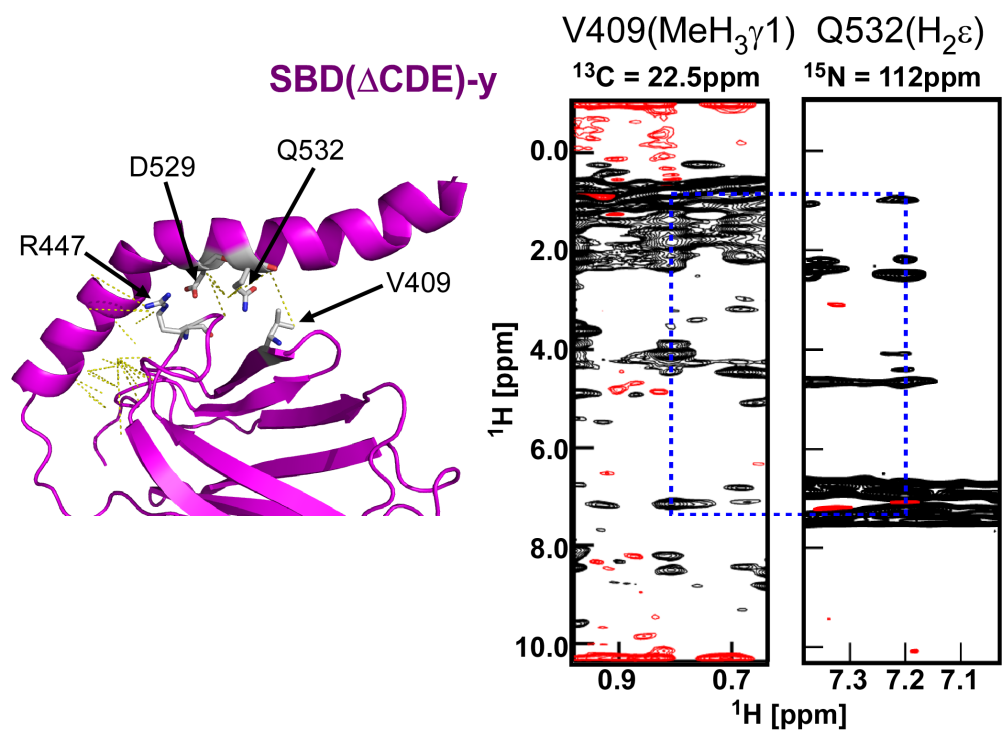

**Figure S10.** Inter-subdomain interaction mediated by salt bridge between R447 and D529. (a) NOEs observed between the  $\alpha$ Lid and  $\beta$ SBD in SBD( $\Delta$ CDE) are depicted as yellow dashed lines (right) with the residue positions for R447 and Q532 drawn in ball-and-stick representation. (b) NOEs observed between the  $\alpha$ Lid and  $\beta$ SBD in SBD( $\Delta$ CDE)-y are depicted as yellow dashed lines. The NOE between V409 and Q532 was absent in SBD( $\Delta$ CDE)-y, indicating that the  $\alpha$ B location differs from that in SBD( $\Delta$ CDE). The signals in red in  $^{13}\text{C}$  3D-NOESY spectrum are negative intensities due to the spectral folding along  $^{13}\text{C}$  dimension.

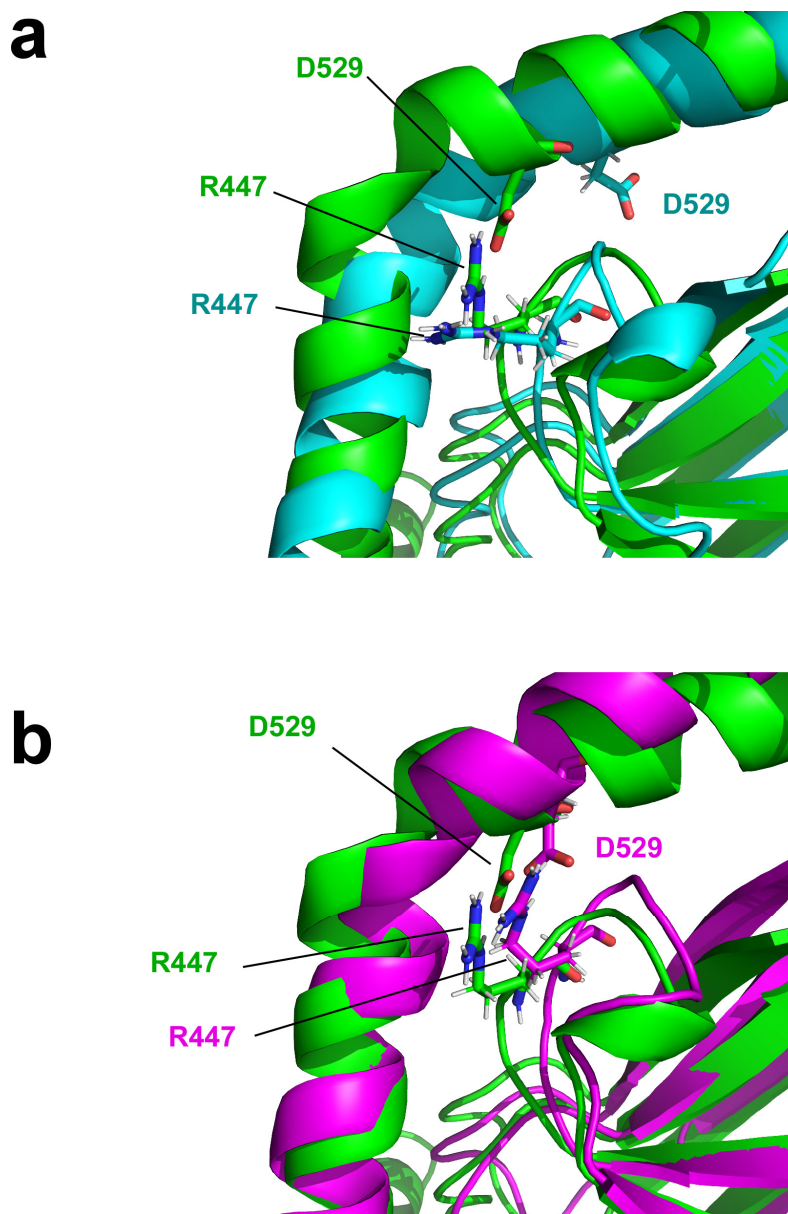

**Figure S11.** Comparison of the positions of residues R447 and D529 engaged in the inter-subdomain interaction. (a) Superposed representation of the inter-subdomain contact site of SBD( $\Delta$ CDE) (cyan) and the crystal structure of the substrate-bound Hsp70 SBD (green) (PDB ID: 4PO2) [3]. (b) Structural comparison between SBD( $\Delta$ CDE)- $\gamma$  (magenta) and the crystal structure of the substrate-bound Hsp70 SBD (green).

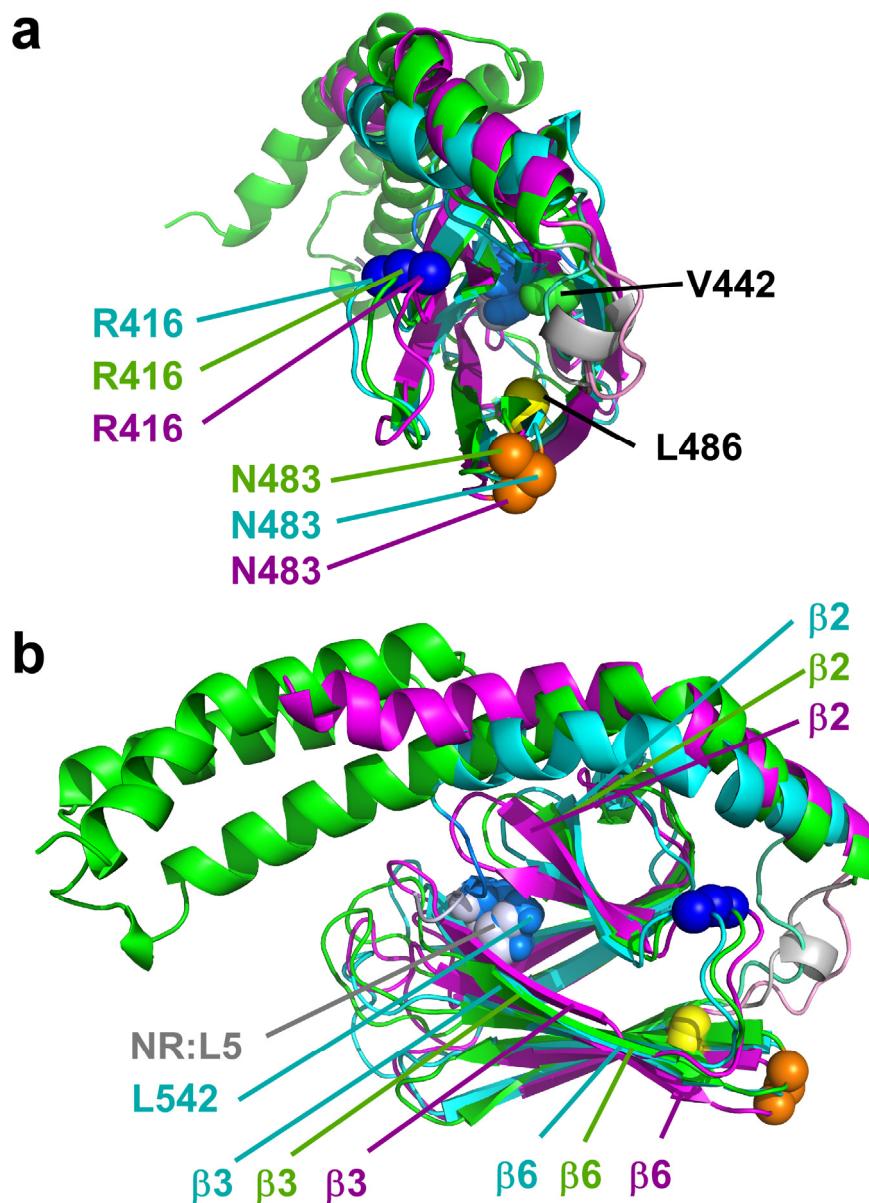

**Figure S12.** Comparison of the positions of residues engaged in the interdomain contact between SBD and NBD. (a) The interdomain contact site structures of SBD(ΔCDE) (cyan), SBD(ΔCDE)-y (magenta) and the crystal structure of the substrate-bound Hsp70 SBD (PDB ID: 4PO2) [3] are superpositioned.  $\alpha$  positions of R416 and N483 are represented by spheres. (b) The same structural superposition of the three proteins displayed at a different orientation. L542 (light blue) in the substrate binding cleft of SBD(ΔCDE) and L5 (gray) of the NR-peptide in the Hsp70 SBD crystal structure are shown as spheres.

## Supplementary Table

**Table S1.** Structural statistics of the 10 lowest-energy structures of SBD( $\Delta$ CDE) and SBD( $\Delta$ CDE)-y.

|                                                        | SBD( $\Delta$ CDE)         | SBD( $\Delta$ CDE)-y         |
|--------------------------------------------------------|----------------------------|------------------------------|
| Completeness of resonance assignments (%) <sup>a</sup> |                            |                              |
| Backbone                                               | 95.8                       | 92.1                         |
| Side chain                                             | 90.6                       | 86.9                         |
| Aromatic                                               | 78.9                       | 95.2                         |
| Stereospecific methyl                                  | 87.9                       | 79.2                         |
| Conformational restraints                              |                            |                              |
| Distance restraints                                    |                            |                              |
| Total                                                  | 2,208                      | 1,828                        |
| Intraresidue ( $i = j$ )                               | 592                        | 569                          |
| Sequential ( $ i - j  = 1$ )                           | 662                        | 550                          |
| Medium range ( $1 <  i - j  < 5$ )                     | 269                        | 216                          |
| Long range ( $ i - j  \geq 5$ )                        | 685                        | 493                          |
| Dihedral angle restraints <sup>b</sup>                 | 202                        | 226                          |
| No. of restraints per residue                          | 11.9                       | 9.9                          |
| No. of long-range restraints per residue               | 3.7                        | 2.7                          |
| Residual restraint violations                          |                            |                              |
| Average no. of distance violations per structure       |                            |                              |
| 0.1–0.3 Å                                              | 2.8                        | 2.0                          |
| 0.3–0.5 Å                                              | 0.5                        | 0.5                          |
| > 0.5 Å                                                | 0.0                        | 0                            |
| Average no. of dihedral angle violations per structure |                            |                              |
| > 5°                                                   | 0.0                        | 0                            |
| Model quality <sup>c</sup>                             |                            |                              |
| RMSD backbone atoms (Å) <sup>d</sup>                   | 1.21 ± 0.24                | 1.22 ± 0.29<br>(2.43 ± 0.91) |
| RMSD heavy atoms (Å) <sup>d</sup>                      | 1.83 ± 0.30                | 1.78 ± 0.33<br>(2.98 ± 0.88) |
| RMSD bond lengths (Å)                                  | 0.008                      | 0.008                        |
| RMSD bond angles (°)                                   | 0.6                        | 0.6                          |
| MolProbity Ramachandran statistics <sup>c</sup>        |                            |                              |
| Most favored regions (%)                               | 96.6 <sup>e</sup>          | 96.7 <sup>f</sup>            |
| Allowed regions (%)                                    | 3.3 <sup>e</sup>           | 3.0 <sup>f</sup>             |
| Disallowed regions (%)                                 | 0.1 <sup>e</sup>           | 0.3 <sup>f</sup>             |
| Global quality scores (raw / Z score) <sup>c</sup>     |                            |                              |
| Verify3D                                               | 0.32 / –2.25               | 0.27 / –3.05                 |
| ProsaII                                                | 0.27 / –1.57               | 0.31 / –1.41                 |
| PROCHECK ( $\phi$ - $\psi$ )                           | –0.45 / –1.46 <sup>e</sup> | –0.50 / –1.65 <sup>f</sup>   |
| PROCHECK (all)                                         | –0.42 / –2.48 <sup>e</sup> | –0.44 / –2.60 <sup>f</sup>   |
| MolProbity clash score                                 | 16.51 / –1.31              | 14.51 / –0.96                |
| Model contents                                         |                            |                              |
| Total no. of residues                                  | 185                        | 185                          |
| BMRB accession number                                  | 36077                      | 36078                        |
| PDB ID code                                            | 5XI9                       | 5XIR                         |

<sup>a</sup>The number excluding highly exchangeable protons, nitrogens bound with highly exchangeable protons, nonprotonated carbons and nitrogens.

<sup>b</sup>The angle restraints were derived from TALOS+ [2] with the angle ranges  $\pm 30^\circ$ .

<sup>c</sup>Calculated using PSVS version 1.5 [4]. The steric clash noted in the significant value in Disallowed regions may come from the ambiguous puckers of Pro residues. In the present calculation, all Pro residues were fixed to C'-endo, although some Pro may interconvert between C'-exo and C'-endo. In the present structures, we realized Pro472 in L<sub>5,6</sub> loop tends to cause steric clash, presumably due to some extent of the population of C'-exo pucker occurring in Pro472.

<sup>d</sup>For residues in secondary structure elements (L401–T405, V409–I414, T422–T430, G437–E444, T450–D452, N454–S462, I474–I480, L486–D492, A498–I503 and K512–K524). In parentheses for SBD( $\Delta$ CDE)-y, the RMSD values take into account the non-converged  $\alpha$ B (K526–E543).

<sup>e</sup>For residues L393–R416, S418–S432, V438–E444, A448–L456, R458–S462, I464–P468, P472–T504, R509–R535 and A541–

---

E543, as the ordered residues estimated by PSVS.

<sup>f</sup>For residues V396–P436, V438–S462, I464–A467, Q473–T504 and R509–S544, as the ordered residues estimated by PSVS.

---

### Supplementary References

1. Berjanskii, M.V.; Wishart, D.S. A simple method to predict protein flexibility using secondary chemical shifts. *Journal of the American Chemical Society* **2005**, *127*, 14970-14971.
2. Shen, Y.; Delaglio, F.; Cornilescu, G.; Bax, A. Talos+: A hybrid method for predicting protein backbone torsion angles from nmr chemical shifts. *Journal of biomolecular NMR* **2009**, *44*, 213-223.
3. Zhang, P.; Leu, J.I.; Murphy, M.E.; George, D.L.; Marmorstein, R. Crystal structure of the stress-inducible human heat shock protein 70 substrate-binding domain in complex with peptide substrate. *PloS one* **2014**, *9*, e103518.
4. Bhattacharya, A.; Tejero, R.; Montelione, G.T. Evaluating protein structures determined by structural genomics consortia. *Proteins* **2007**, *66*, 778-795.
